# Supplementary material for: Br doping-induced evolution of the electronic band structure in dimorphic and hexagonal SnSe 2 thermoelectric materials
Source: Royal Society of Chemistry journal article supplement (doi:10.1039/d3ra07751a), 2024-01-01
Supplement: d3ra07751a1.pdf [file d3ra07751a1.pdf]

*Supplementary Information for*

**Br doping-induced evolution of the electronic band structure in dimorphic and hexagonal SnSe<sub>2</sub> thermoelectric materials**

Se-Jun Kim,<sup>†a</sup> Minsu Heo,<sup>†a</sup> Sang-il Kim,<sup>†a</sup> Hyunjin Park,<sup>a</sup> Jeong-Yeon Kim,<sup>a</sup> Won-Seon Seo,<sup>b</sup> and Hyun-Sik Kim<sup>\*a</sup>

<sup>a</sup> Department of Materials Science and Engineering, University of Seoul, Seoul 02504, South Korea

<sup>b</sup> Department of Materials Science and Engineering, Yonsei University, Seoul 03722, South Korea

<sup>†</sup> These authors contributed equally to this study.

\* Corresponding author (hyunsik.kim@uos.ac.kr)

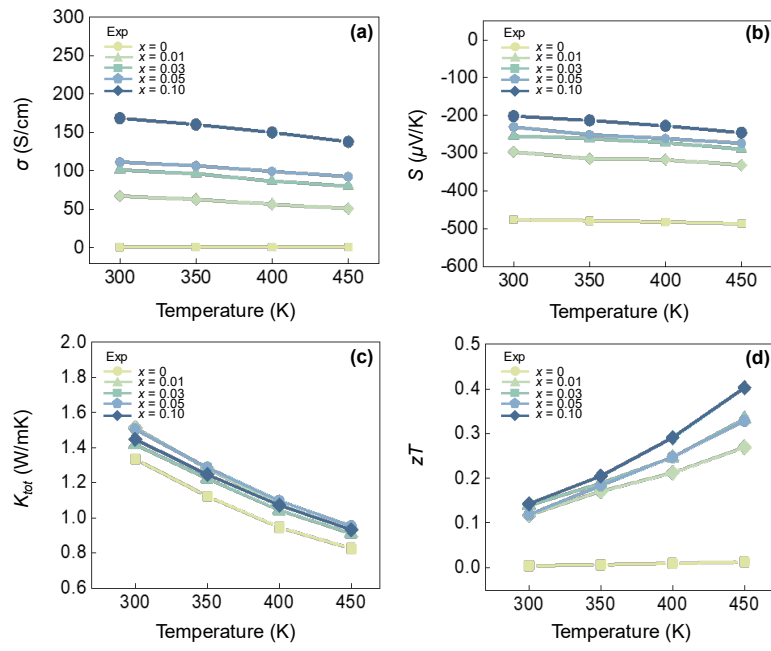

Fig. S1 Temperature-dependent (a)  $\sigma$ , (b)  $S$ , (c)  $\kappa_{\text{tot}}$ , and (d)  $zT$  of  $\text{SnSe}_{2-x}\text{Br}_x$  ( $x = 0 - 0.10$ ).<sup>1</sup>

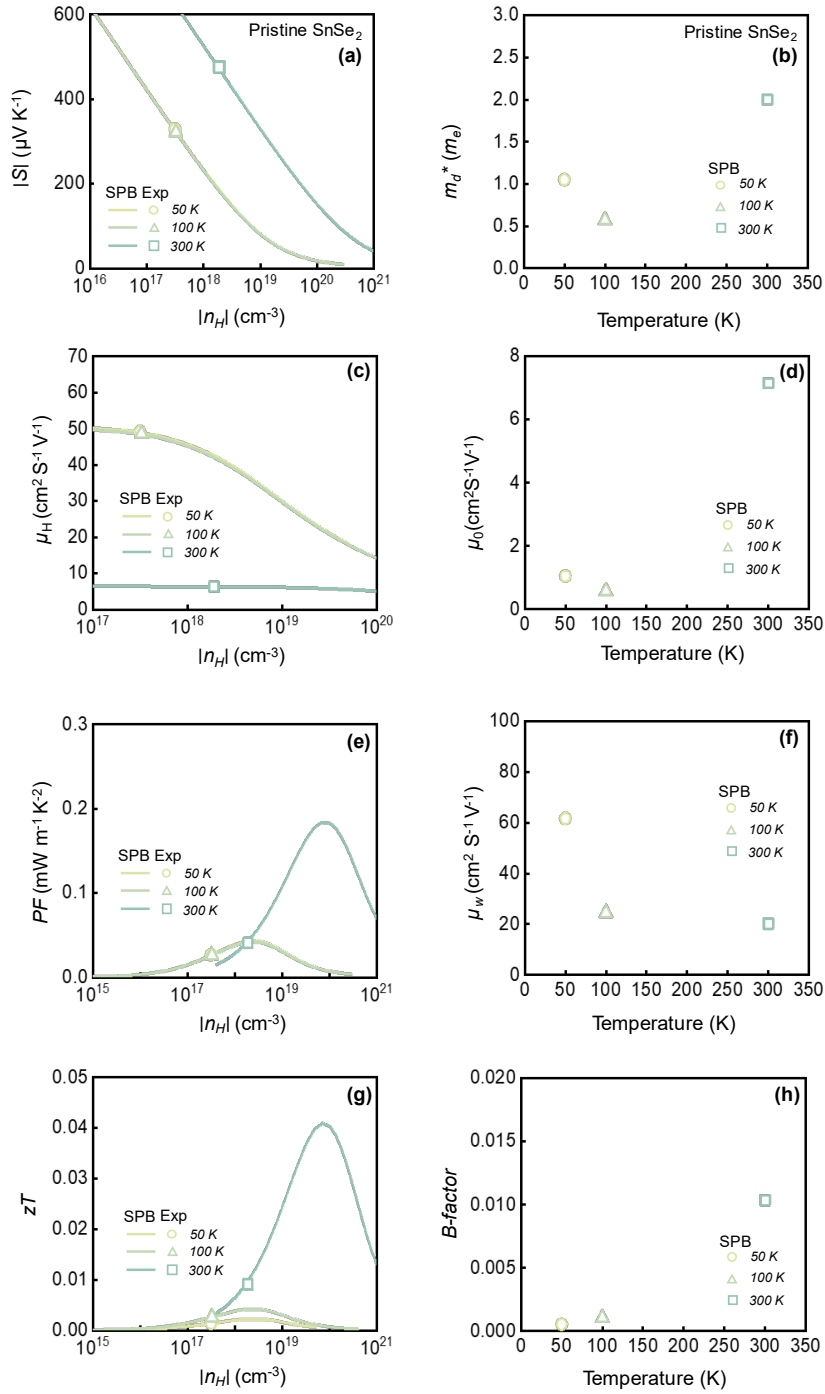

Fig. S2 (a) Calculated and experimental  $S$  as a function of  $n_H$ , (b) temperature-dependent  $m_d^*$ , (c) calculated and experimental  $\mu_H$  as a function of  $n_H$ , (d) temperature-dependent  $\mu_0$ , (e) calculated and experimental  $PF$  as a function of  $n_H$ , (f) temperature-dependent  $\mu_w$ , (g) calculated and experimental  $zT$  as a function of  $n_H$ , (h) temperature-dependent  $B$ -factor for pristine SnSe<sub>2</sub> at 50 – 300 K.<sup>2</sup>

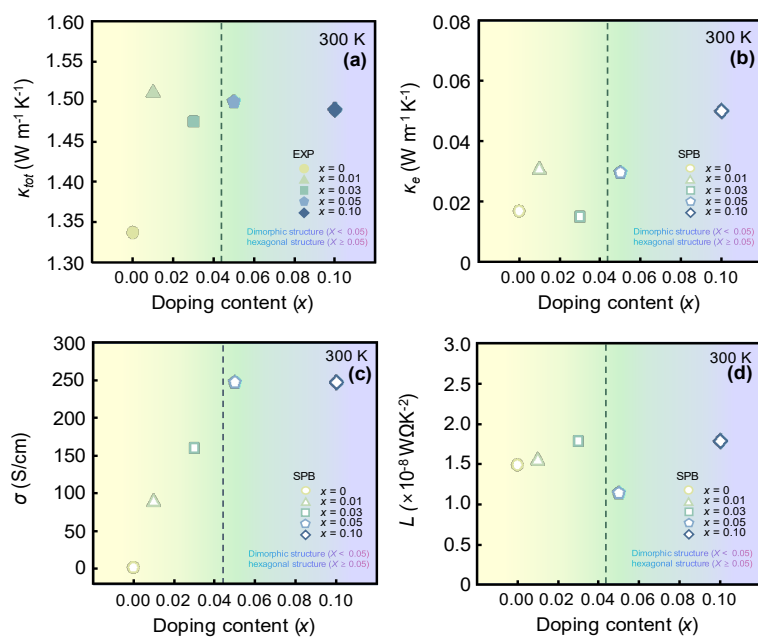

Fig. S3 (a) Experimental total thermal conductivity ( $\kappa_{tot}$ ), (b) calculated  $\kappa_e$ , (c) experimental  $\sigma$ , and (d) calculated  $L$  for different Br doping content (x).<sup>1</sup>

## References

1. M. Liu, J. Zhang, J. Xu, B. Hu, B. Liu, K. Sun, Y. Yang, J. Wang and B. Du, *J. Solid State Chem.*, 2020, **289**, 121468.
2. J. Wang, X. Jia, S. Lou, G. Li, S. Zhou, *ACS Omega*, 2020, **5**, 12409.
